# Supplementary material
Source: PubMed Central journal article supplement (PMC6994989)
Supplement: pnas.1912921117.sapp.pdf [file pnas.1912921117.sapp.pdf]

# PNAS

www.pnas.org

## Supplementary Information for

### Water level changes, subsidence and sea level rise in the Ganges-Brahmaputra-Meghna delta

Mélanie Becker<sup>a,1</sup>, Fabrice Papa<sup>b,c</sup>, Mikhaïl Karpytchev<sup>a</sup>, Caroline Delebecque<sup>b</sup>, Yann Krier<sup>d</sup>, Jamal Uddin Khan<sup>b,e</sup>,  
Valérie Ballu<sup>a</sup>, Fabien Durand<sup>b</sup>, Gonéri Le Cozanne<sup>f</sup>, A. K. M. Saiful Islam<sup>g</sup>, Stéphane Calmant<sup>b</sup>, and C. K. Shum<sup>h</sup>

*a. Littoral Environnement et Sociétés, Centre National de la Recherche Scientifique - Université de La Rochelle, 2 rue Olympe de Gouges, 17000 La Rochelle, France. b. Laboratoire d'Etudes en Géophysique et Océanographie Spatiales, Centre National de la Recherche Scientifique - Institut de recherche pour le développement - Université Toulouse Paul Sabatier - Centre national d'études spatiales, 14 avenue Edouard Belin 31400 Toulouse, France. c. Indo-French Cell for Water Sciences, International Joint Laboratory Institut de Recherche pour le Développement and Indian Institute of Science, Indian Institute of Science, 560012 Bangalore, India d. Laboratoire de Recherche en Géosciences et Energies, Université des Antilles, Campus de Fouillole, 97159 Pointe-à-Pitre, France. e. Institute of Water and Flood Management, Bangladesh University of Engineering and Technology, Dhaka-1000, Bangladesh. f. Bureau de Recherches Géologiques et Minières, 3 avenue Claude Guillemin; 45060 Orléans Cedex, France. g. Division of Geodetic Science, School of Earth Sciences, Ohio State University, Columbus, OH. h. Institute of Geodesy & Geophysics, Chinese Academy of Sciences, Wubao, China*

<sup>1</sup> Corresponding author: Mélanie Becker  
[melanie.becker@univ-lr.fr](mailto:melanie.becker@univ-lr.fr)

#### This PDF file includes:

Figures S1 to S5  
Tables S1 to S3  
References for SI reference citations

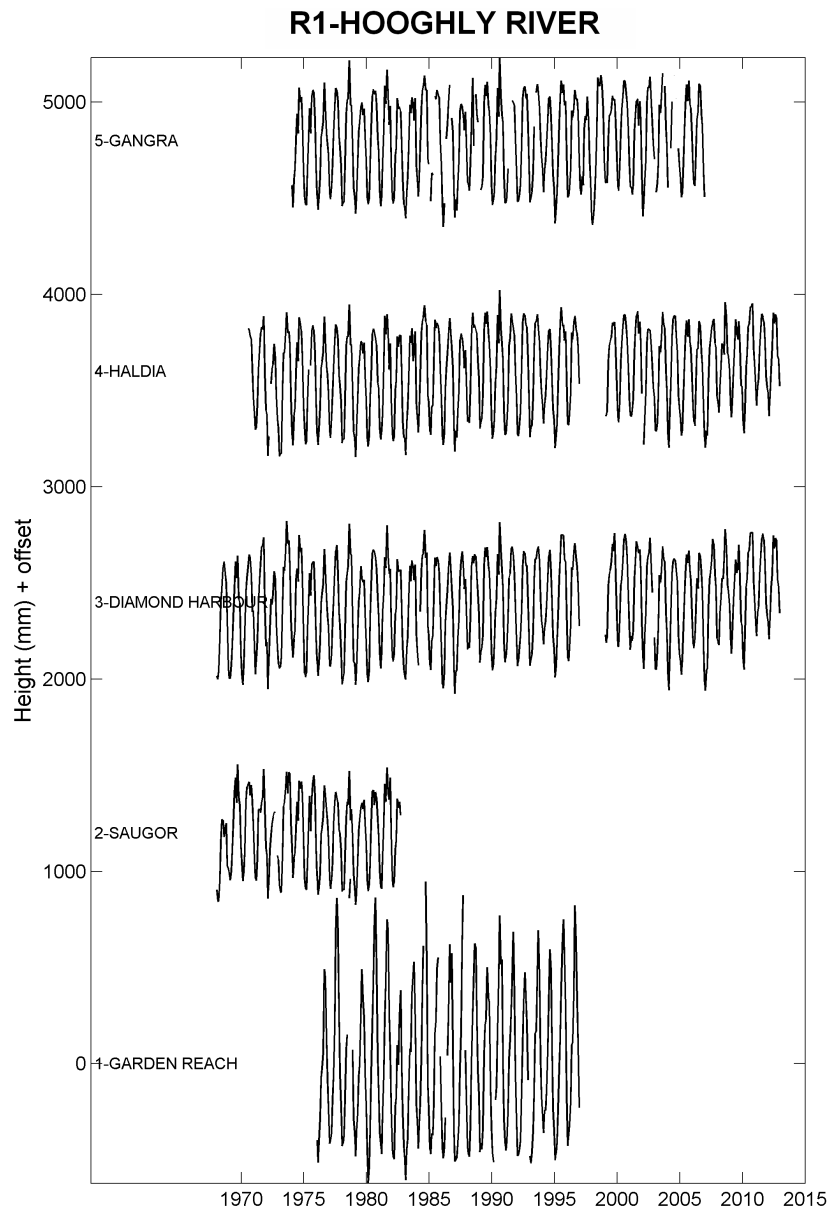

**Fig. S1a.** Water level gauges time series from the Region 1 - Hooghly River.

## R2-GANGES TIDAL FLOODPLAIN/SUNDARBANS

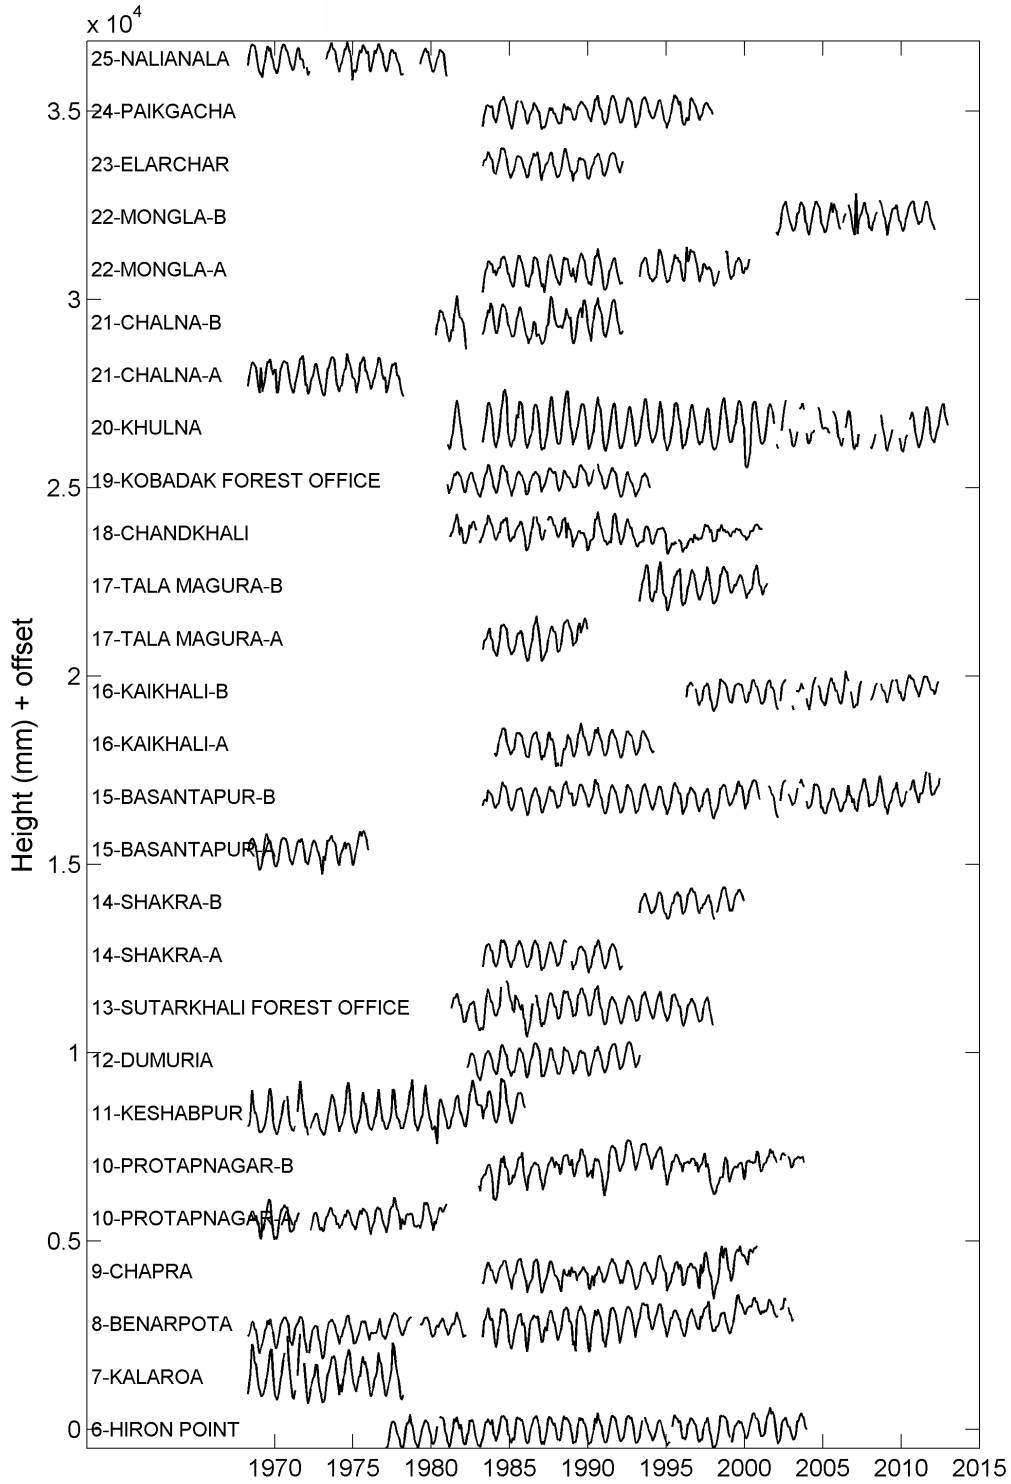

**Fig. S1b.** Water level gauges time series from the Region 2 - Ganges tidal floodplain/Sundarbans.

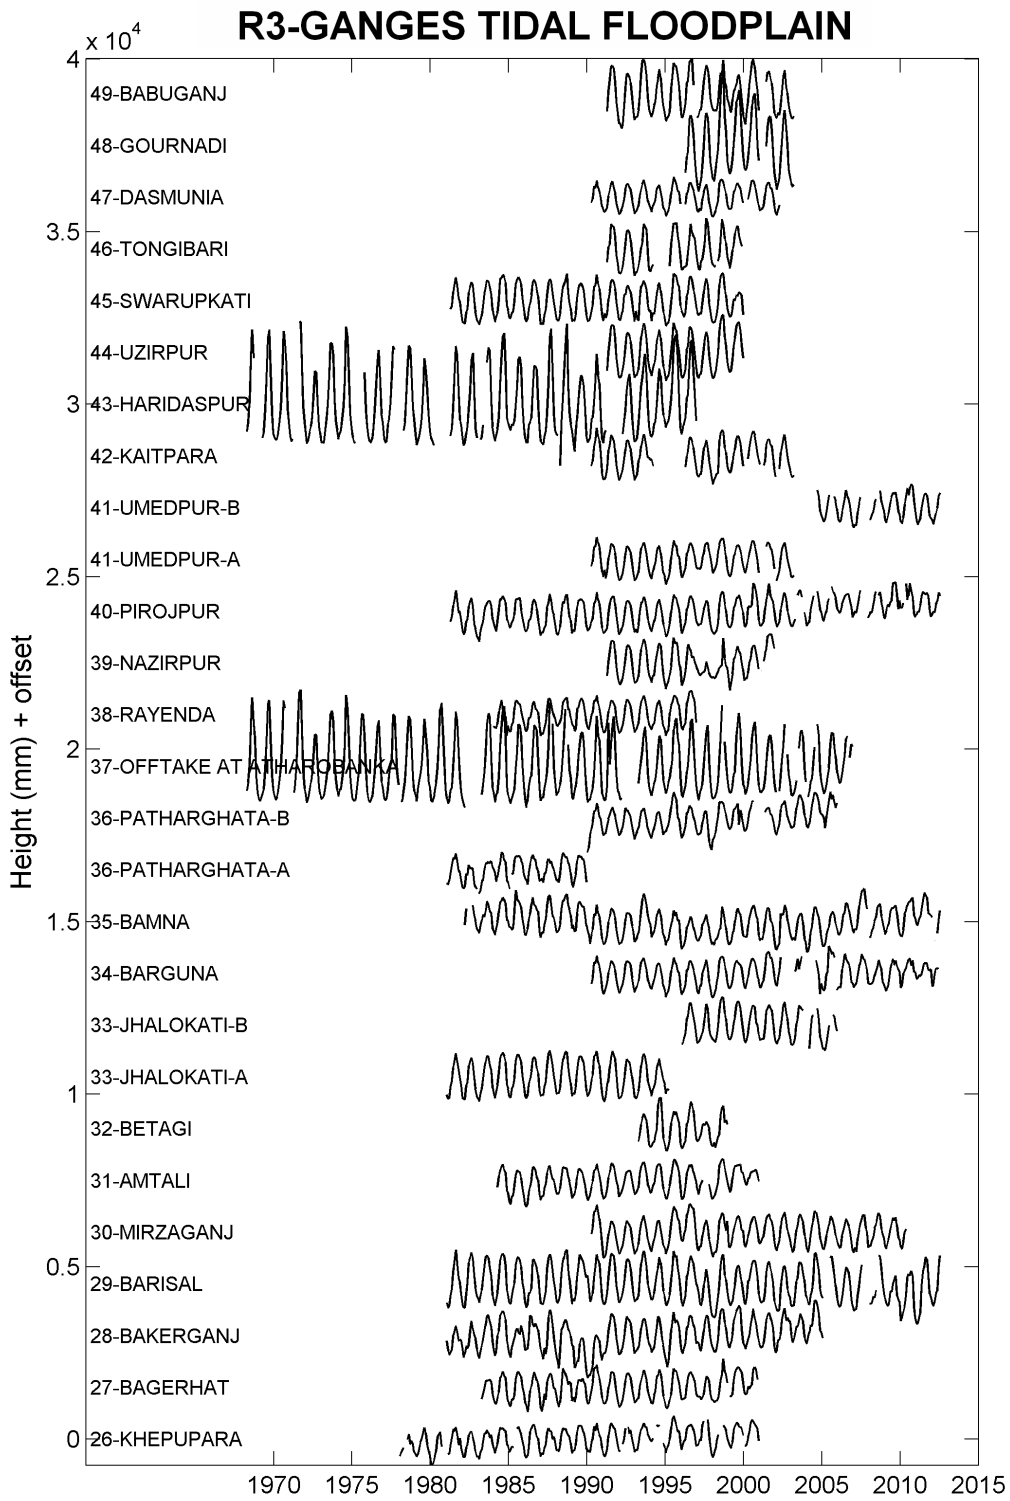

**Fig. S1c.** Water level gauges time series from the Region 3 - Ganges tidal floodplain.

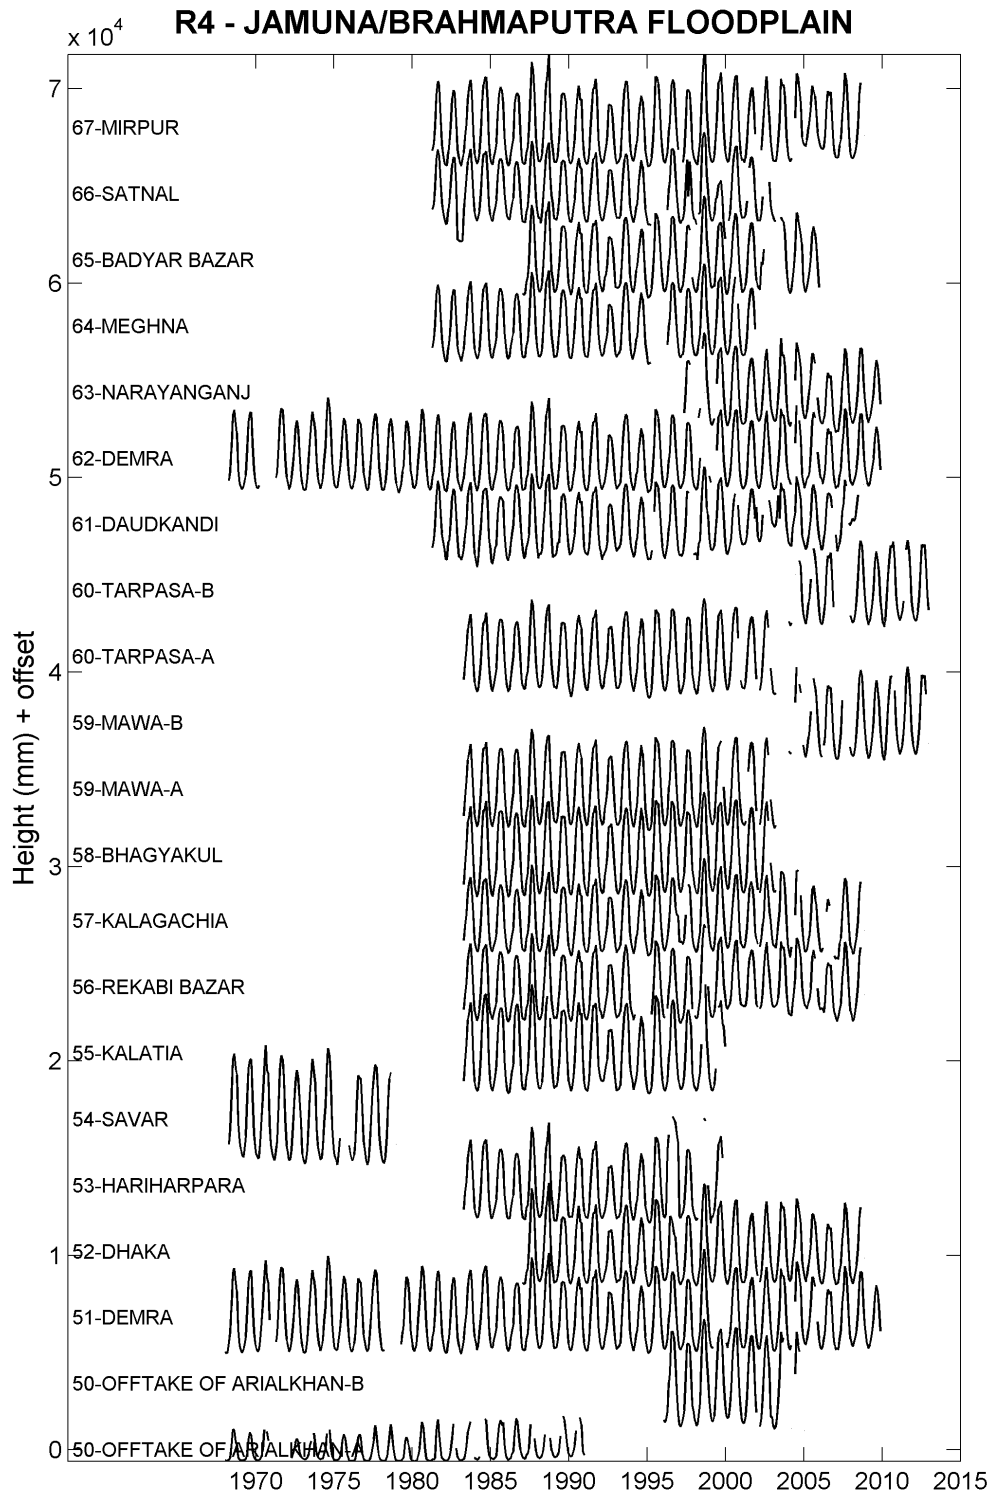

**Fig. S1d.** Water level gauges time series from the Region 4 - Jamuna/Brahmaputra floodplain.

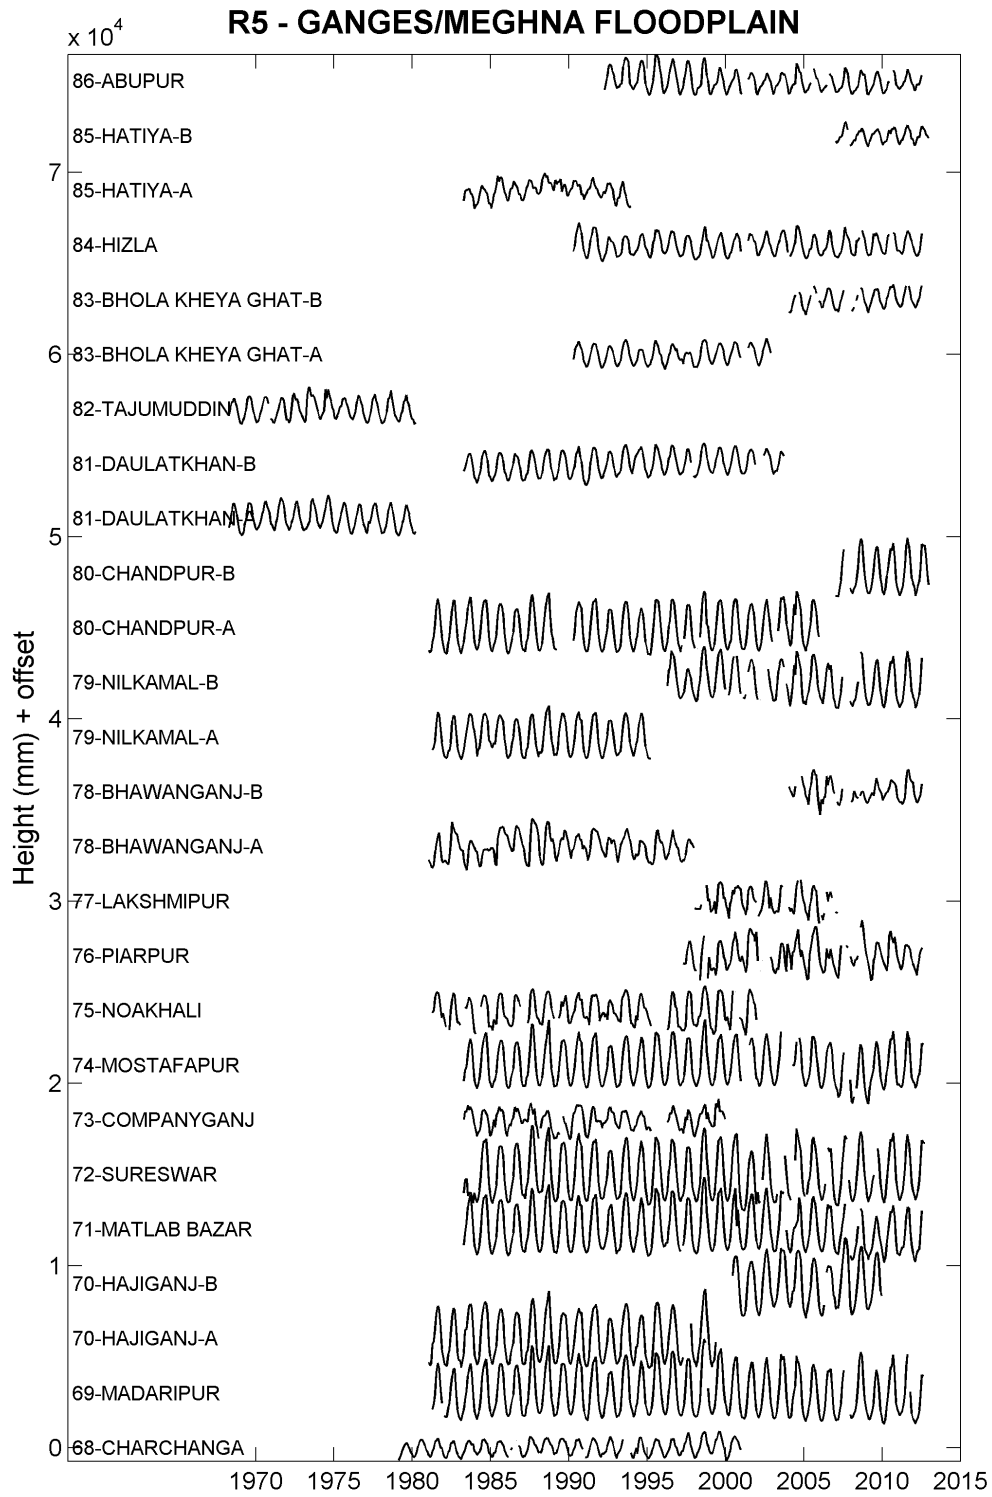

**Fig. S1e.** Water level gauges time series from the Region 5 - Ganges/Meghna rivers floodplain.

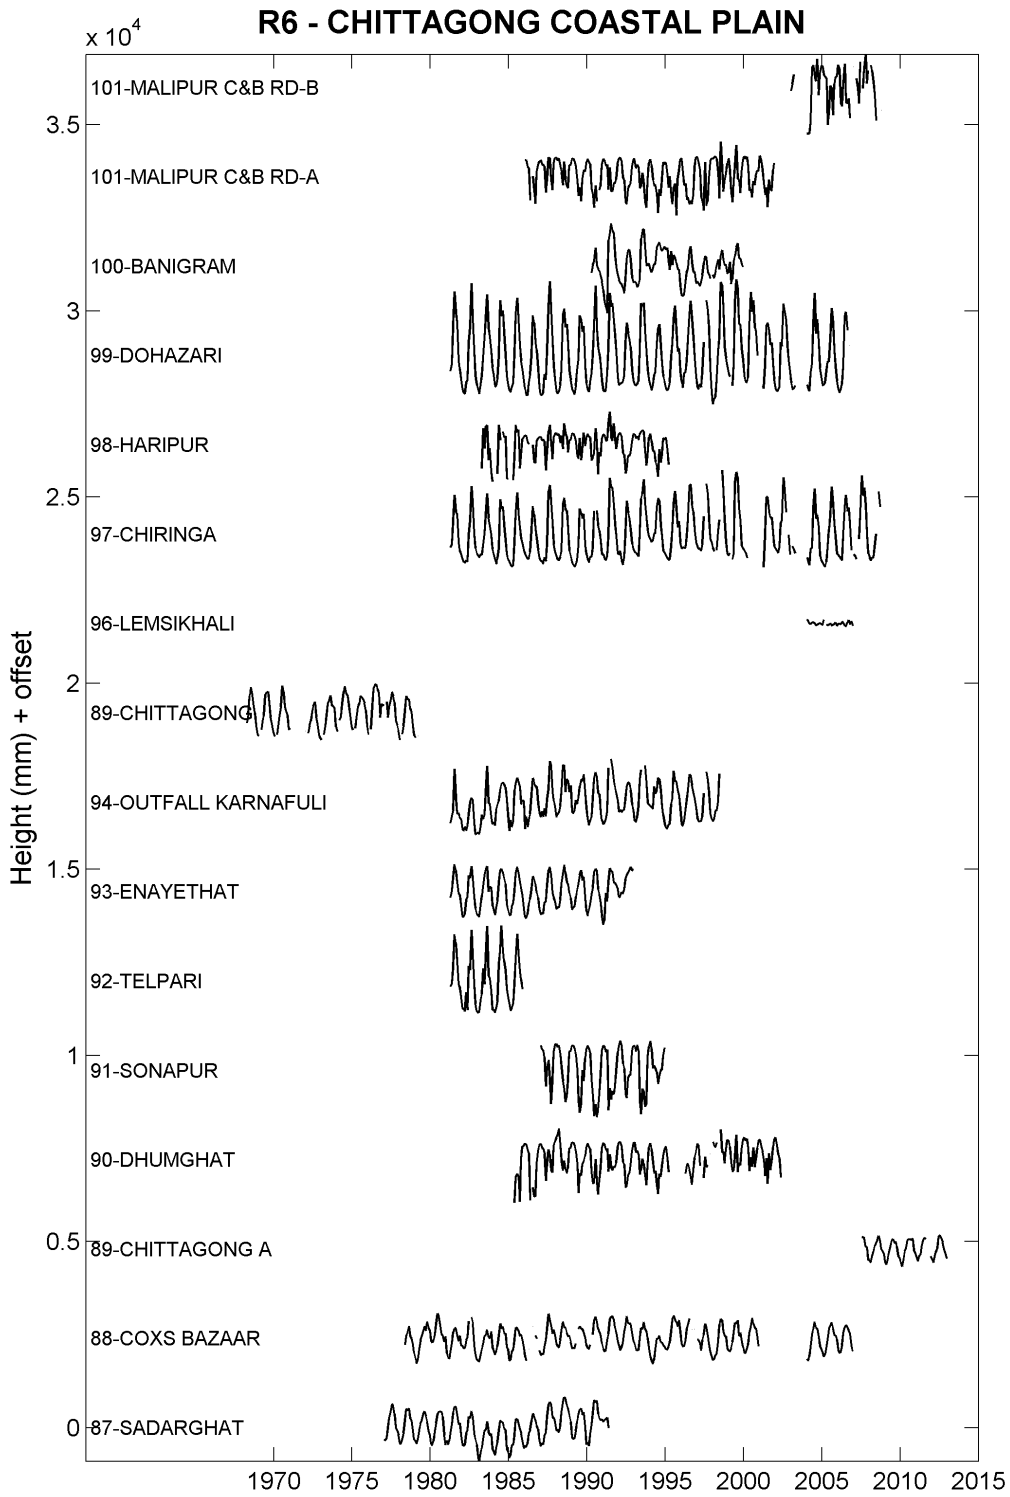

**Fig. S1f.** Water level gauges time series from the Region 6 - Chittagong coastal plain.

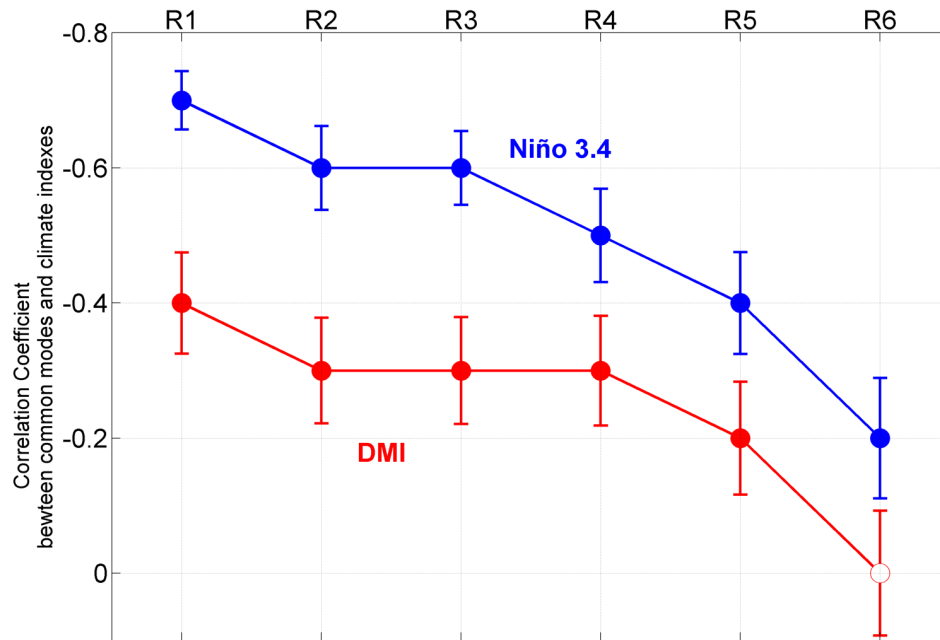

**Fig. S2.** Correlation coefficient between regional RWL time series and climate indexes. The correlation coefficients are estimated between the detrended regional RWL and Niño 3.4 index and DMI respectively and given with their 95% confidence interval (two-tail). All the coefficients are significantly different from zero ( $p < 0.001$ ), excepted with DMI in R6 ( $p > 0.4$ , white point).



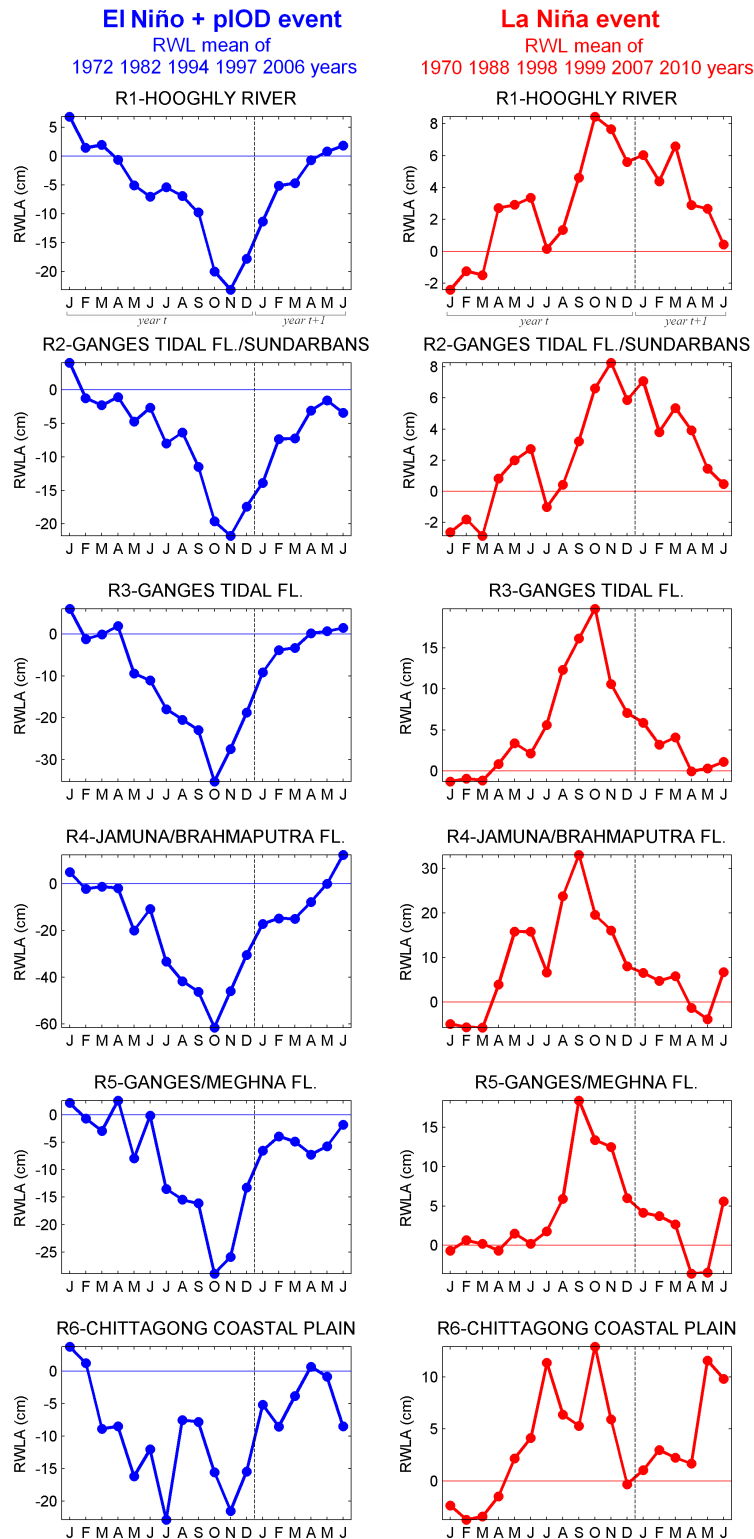

**Fig. S3.** Evolution of the average interannual RWL anomaly (RWLA) for each region : On the left side , in blue, the RWLA average during El Niño + pIOD events (1972, 1982, 1994, 1997 and 2006, in blue) and on the right side , in red, the RWLA average during La Niña events (1970, 1988, 1998, 1999, 2007 and 2010).

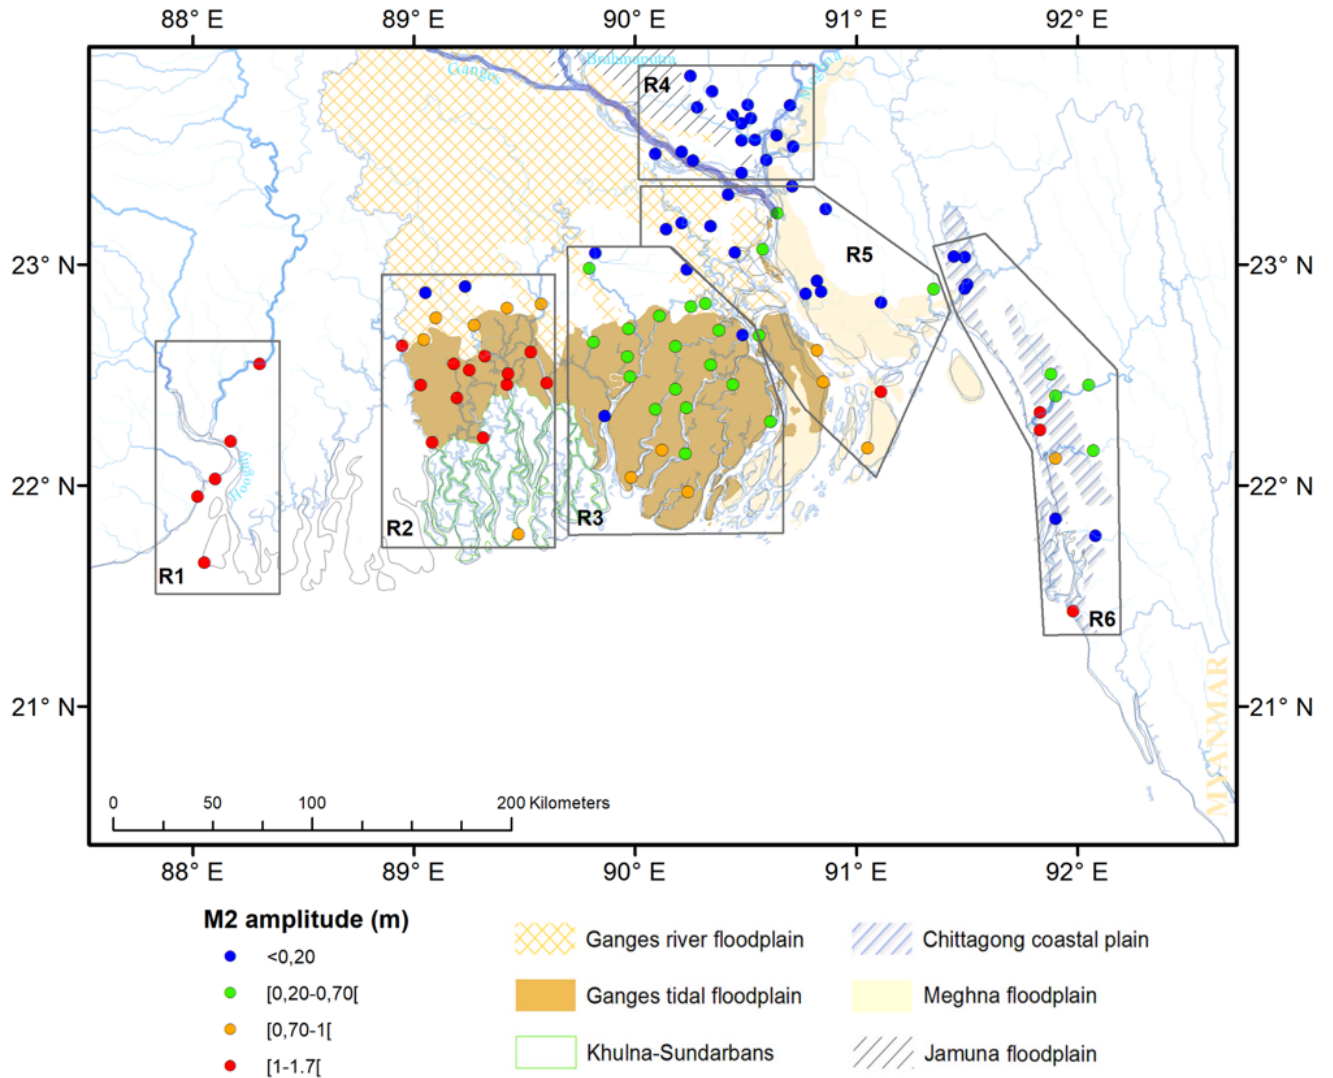

**Fig. S4.** Regionalization parameters: M<sub>2</sub> tidal constituent amplitude (in meters) from the water level records of the Bangladesh Water Development Board (1), the physiogeographic units originate from (2) and the river network derived from HydroSHEDS (<https://www.hydrosheds.org/>).

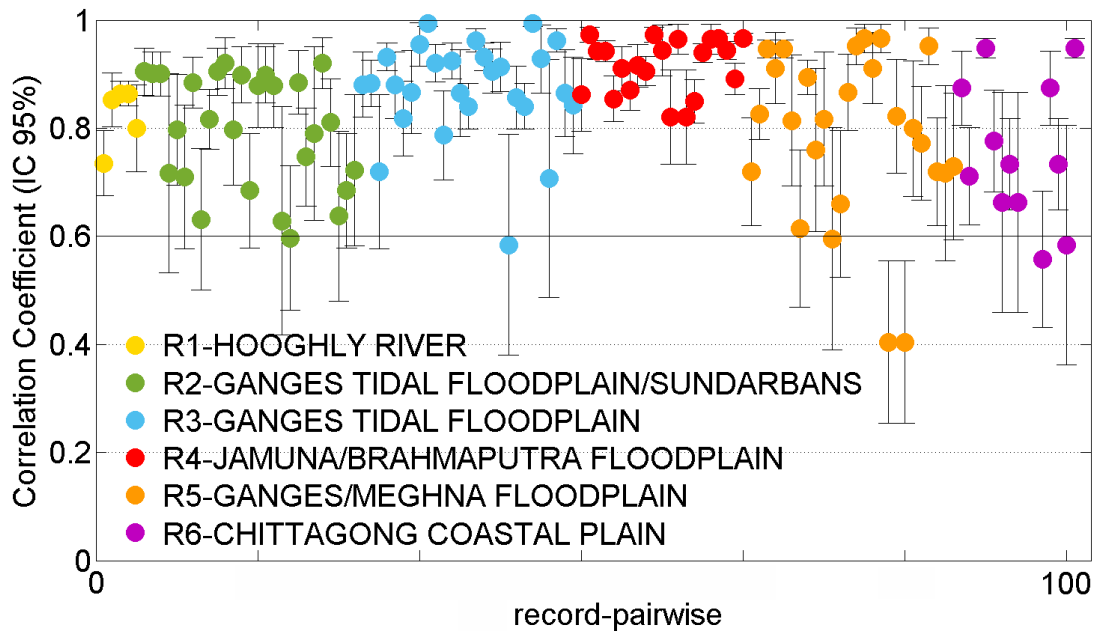

**Fig. S5.** Station-pairwise maximum correlation coefficients. The correlation coefficient is calculated for the 12yr-running mean detrended relative sea-level (RWL). At each site by regions, it presents the maximum of correlation coefficient between the monthly RWL for each site and the monthly RWL for all the other sites into the region. This coefficient computed only if the records overlapped for at least 2 years. The error bars correspond to a 95% confidence interval. The correlation coefficients are generally greater than 0.6, except for the Tajumuddin and Daulatkhan sites ( $r$  is in [0.3 0.6] estimated for 10 years) in R5. Although their correlation coefficient is low, these records are used to perform the comparison with model predicted RWL rates, because these measurements are the only information available for the 1968-1980 period in this region.

**Table S1.** Summary table of the water level gauges network. 'ID' corresponds to the station location on Figure 1, 'Code' is the institution ID ('SW' from BUET and 'P' from PSMSL).

| ID                                                   | Code     | NAME                     | Lat  | Lon  | Date |      | Length(yr) | % Missing<br>(max consecutive<br>months missing) |
|------------------------------------------------------|----------|--------------------------|------|------|------|------|------------|--------------------------------------------------|
| <b>REGION 1 – HOOGHLY RIVER (5)</b>                  |          |                          |      |      |      |      |            |                                                  |
| 1                                                    | P0369    | GARDIEN REACH            | 22,6 | 88,3 | 1976 | 1996 | 21         | 2%(1)                                            |
| 2                                                    | P0417    | SAUGOR                   | 21,7 | 88,1 | 1968 | 1982 | 15         | 1%(1)                                            |
| 3                                                    | P0543    | DIAMOND HARBOUR          | 22,2 | 88,2 | 1968 | 2012 | 45         | 4%(22)                                           |
| 4                                                    | P1270    | HALDIA                   | 22,0 | 88,1 | 1970 | 2012 | 43         | 5%(22)                                           |
| 5                                                    | P1369    | GANGRA                   | 22,0 | 88,0 | 1974 | 2006 | 33         | 3%(2)                                            |
| <b>REGION 2 – GANGES TIDAL FLOODPLAIN/SUNDARBANS</b> |          |                          |      |      |      |      |            |                                                  |
| 6                                                    | P1451    | HIRON POINT              | 21,8 | 89,5 | 1977 | 2003 | 27         | 1%(1)                                            |
| 7                                                    | SW023    | KALAROA                  | 22,9 | 89,0 | 1968 | 1978 | 10         | 3%(2)                                            |
| 8                                                    | SW024    | BENARPOTA                | 22,8 | 89,1 | 1968 | 2003 | 35         | 5%(12)                                           |
| 9                                                    | SW025    | CHAPRA                   | 22,5 | 89,2 | 1983 | 2000 | 18         | 0%(0)                                            |
| 10                                                   | SW026A   | PROTAPNAGAR              | 22,4 | 89,2 | 1968 | 1980 | 13         | 5%(8)                                            |
| 10                                                   | SW026B   | PROTAPNAGAR              | 22,4 | 89,2 | 1983 | 2003 | 21         | 1%(2)                                            |
| 11                                                   | SW027    | KESHABPUR                | 22,9 | 89,2 | 1968 | 1985 | 18         | 1%(1)                                            |
| 12                                                   | SW028    | DUMURIA                  | 22,8 | 89,4 | 1982 | 1993 | 11         | 0%(0)                                            |
| 13                                                   | SW029    | SUTARKHALI FOREST OFFICE | 22,5 | 89,4 | 1981 | 1997 | 17         | 1%(2)                                            |
| 14                                                   | SW128A   | SHAKRA                   | 22,6 | 88,9 | 1983 | 1992 | 9          | 3%(3)                                            |
| 14                                                   | SW128B   | SHAKRA                   | 22,6 | 88,9 | 1993 | 1999 | 7          | 0%(0)                                            |
| 15                                                   | SW129A   | BASANTAPUR               | 22,5 | 89,0 | 1968 | 1975 | 8          | 0%(0)                                            |
| 15                                                   | SW129B   | BASANTAPUR               | 22,5 | 89,0 | 1983 | 2012 | 29         | 2%(4)                                            |
| 16                                                   | SW130A   | KAIKHALI                 | 22,2 | 89,1 | 1984 | 1994 | 10         | 0%(0)                                            |
| 16                                                   | SW130B   | KAIKHALI                 | 22,2 | 89,1 | 1996 | 2012 | 16         | 7%(4)                                            |
| 17                                                   | SW163A   | TALA MAGURA              | 22,7 | 89,3 | 1983 | 1989 | 7          | 0%(0)                                            |
| 17                                                   | SW163B   | TALA MAGURA              | 22,7 | 89,3 | 1993 | 2001 | 8          | 0%(0)                                            |
| 18                                                   | SW164    | CHANDKHALI               | 22,5 | 89,3 | 1981 | 2001 | 20         | 1%(1)                                            |
| 19                                                   | SW165    | KOBADAK FOREST OFFICE    | 22,2 | 89,3 | 1981 | 1993 | 13         | 1%(2)                                            |
| 20                                                   | SW241    | KHULNA                   | 22,8 | 89,6 | 1981 | 2014 | 34         | 8%(12)                                           |
| 21                                                   | SW243A   | CHALNA                   | 22,6 | 89,5 | 1968 | 1978 | 10         | 0%(0)                                            |
| 21                                                   | SW243B   | CHALNA                   | 22,6 | 89,5 | 1980 | 1992 | 12         | 8%(12)                                           |
| 22                                                   | SW244A   | MONGLA                   | 22,5 | 89,6 | 1983 | 2000 | 17         | 8%(12)                                           |
| 22                                                   | SW244B   | MONGLA                   | 22,5 | 89,6 | 2002 | 2012 | 10         | 1%(1)                                            |
| 23                                                   | SW254.5  | ELARCHAR                 | 22,7 | 89,0 | 1983 | 1992 | 9          | 0%(0)                                            |
| 24                                                   | SW258    | PAIKGACHA                | 22,6 | 89,3 | 1983 | 1997 | 15         | 0%(0)                                            |
| 25                                                   | SW259    | NALIANALA                | 22,5 | 89,4 | 1968 | 1980 | 13         | 16%(12)                                          |
| <b>REGION 3 – GANGES TIDAL FLOODPLAIN</b>            |          |                          |      |      |      |      |            |                                                  |
| 26                                                   | P1454    | KHEPUPARA                | 22,0 | 90,2 | 1978 | 2000 | 23         | 5%(4)                                            |
| 27                                                   | SW001    | BAGERHAT                 | 22,6 | 89,8 | 1983 | 2000 | 18         | 0%(0)                                            |
| 28                                                   | SW018.1  | BAKERGANJ                | 22,5 | 90,3 | 1981 | 2005 | 24         | 0%(0)                                            |
| 29                                                   | SW018    | BARISAL                  | 22,7 | 90,4 | 1981 | 2012 | 32         | 2%(4)                                            |
| 30                                                   | SW019    | MIRZAGANJ                | 22,4 | 90,2 | 1990 | 2010 | 20         | 0%(0)                                            |
| 31                                                   | SW020    | AMTALI                   | 22,1 | 90,2 | 1984 | 2000 | 17         | 2%(4)                                            |
| 32                                                   | SW037.5  | BETAGI                   | 22,4 | 90,2 | 1993 | 1998 | 6          | 0%(0)                                            |
| 33                                                   | SW037A   | JHALOKATI                | 22,6 | 90,2 | 1981 | 1995 | 14         | 0%(0)                                            |
| 33                                                   | SW037B   | JHALOKATI                | 22,6 | 90,2 | 1996 | 2005 | 10         | 5%(4)                                            |
| 34                                                   | SW038.1  | BARGUNA                  | 22,2 | 90,1 | 1990 | 2012 | 22         | 8%(10)                                           |
| 35                                                   | SW038    | BAMNA                    | 22,3 | 90,1 | 1982 | 2012 | 30         | 2%(4)                                            |
| 36                                                   | SW039A   | PATHARGHATA              | 22,0 | 90,0 | 1981 | 1989 | 9          | 1%(1)                                            |
| 36                                                   | SW039B   | PATHARGHATA              | 22,0 | 90,0 | 1990 | 2005 | 16         | 4%(8)                                            |
| 37                                                   | SW105    | OFFTAKE AT ATHAROBANKA   | 23,0 | 89,8 | 1968 | 2006 | 39         | 8%(12)                                           |
| 38                                                   | SW107.2  | RAYENDA                  | 22,3 | 89,9 | 1984 | 1996 | 13         | 0%(0)                                            |
| 39                                                   | SW107A   | NAZIRPUR                 | 22,7 | 90,0 | 1991 | 2001 | 11         | 1%(1)                                            |
| 40                                                   | SW107    | PIROJPUR                 | 22,6 | 90,0 | 1981 | 2012 | 31         | 2%(4)                                            |
| 41                                                   | SW136.1A | UMEDPUR                  | 22,5 | 90,0 | 1990 | 2003 | 13         | 3%(4)                                            |
| 41                                                   | SW136.1B | UMEDPUR                  | 22,5 | 90,0 | 2004 | 2012 | 8          | 7%(4)                                            |
| 42                                                   | SW183    | KAITPARA                 | 22,5 | 90,4 | 1990 | 2003 | 13         | 19%(24)                                          |
| 43                                                   | SW198    | HARIDASPUR               | 23,1 | 89,8 | 1968 | 1996 | 29         | 15%(12)                                          |
| 44                                                   | SW253A   | UZIRPUR                  | 22,8 | 90,3 | 1991 | 1999 | 9          | 0%(0)                                            |
| 45                                                   | SW253    | SWARUPKATI               | 22,8 | 90,1 | 1981 | 1999 | 19         | 0%(0)                                            |
| 46                                                   | SW288.3  | TONGIBARI                | 22,7 | 90,5 | 1991 | 1999 | 9          | 13%(12)                                          |
| 47                                                   | SW290    | DASMUNIA                 | 22,3 | 90,6 | 1990 | 2002 | 12         | 3%(2)                                            |
| 48                                                   | SW300    | GOURNADI                 | 23,0 | 90,2 | 1996 | 2003 | 7          | 5%(4)                                            |
| 49                                                   | SW318    | BABUGANJ                 | 22,8 | 90,3 | 1991 | 2003 | 12         | 3%(4)                                            |

| <b>REGION 4 – JAMUNA/BRAHMAPUTRA FLOODPLAIN</b>   |           |                      |      |      |      |      |    |         |
|---------------------------------------------------|-----------|----------------------|------|------|------|------|----|---------|
| 50                                                | SW004A    | OFFTAKE OF ARIALKHAN | 23,5 | 90,1 | 1968 | 1990 | 23 | 11%(17) |
| 50                                                | SW004B    | OFFTAKE OF ARIALKHAN | 23,5 | 90,1 | 1996 | 2005 | 9  | 9%(5)   |
| 51                                                | SW007.5   | DEMRA                | 23,7 | 90,5 | 1968 | 2009 | 42 | 5%(12)  |
| 52                                                | SW042     | DHAKA                | 23,7 | 90,4 | 1987 | 2008 | 22 | 1%(1)   |
| 53                                                | SW043     | HARIHARPARA          | 23,6 | 90,5 | 1983 | 1999 | 17 | 4%(4)   |
| 54                                                | SW069A    | SAVAR                | 23,8 | 90,2 | 1968 | 1978 | 11 | 6%(6)   |
| 55                                                | SW070     | KALATIA              | 23,7 | 90,3 | 1983 | 1999 | 17 | 1%(1)   |
| 56                                                | SW071A    | REKABI BAZAR         | 23,6 | 90,5 | 1983 | 2008 | 26 | 6%(12)  |
| 57                                                | SW071     | KALAGACHIA           | 23,6 | 90,5 | 1983 | 2008 | 26 | 3%(3)   |
| 58                                                | SW093.4L  | BHAGYAKUL            | 23,5 | 90,2 | 1983 | 2003 | 20 | 1%(1)   |
| 59                                                | SW093.5LA | MAWA                 | 23,5 | 90,3 | 1983 | 2003 | 20 | 2%(1)   |
| 59                                                | SW093.5LB | MAWA                 | 23,5 | 90,3 | 2004 | 2012 | 9  | 9%(4)   |
| 60                                                | SW094A    | TARPASA              | 23,4 | 90,5 | 1983 | 2003 | 20 | 1%(1)   |
| 60                                                | SW094B    | TARPASA              | 23,4 | 90,5 | 2004 | 2014 | 11 | 12%(12) |
| 61                                                | SW115     | DAUDKANDI            | 23,5 | 90,7 | 1981 | 2008 | 28 | 4%(4)   |
| 62                                                | SW179B    | DEMRA                | 23,7 | 90,5 | 1968 | 2009 | 42 | 5%(12)  |
| 63                                                | SW180B    | NARAYANGANJ          | 23,7 | 90,5 | 1997 | 2009 | 13 | 7%(6)   |
| 64                                                | SW275.5   | MEGHNA               | 23,6 | 90,6 | 1981 | 2001 | 21 | 5%(12)  |
| 65                                                | SW275B    | BADYAR BAZAR         | 23,7 | 90,7 | 1987 | 2005 | 19 | 5%(10)  |
| 66                                                | SW276     | SATNAL               | 23,5 | 90,6 | 1981 | 2003 | 22 | 7%(12)  |
| 67                                                | SW302     | MIRPUR               | 23,8 | 90,3 | 1981 | 2008 | 28 | 3%(4)   |
| <b>REGION 5 – GANGES/MEGHNA RIVERS FLOODPLAIN</b> |           |                      |      |      |      |      |    |         |
| 68                                                | P1496     | CHARCHANGA           | 22,2 | 91,1 | 1979 | 2000 | 22 | 3%(4)   |
| 69                                                | SW005     | MADARIPUR            | 23,2 | 90,2 | 1981 | 2012 | 31 | 2%(4)   |
| 70                                                | SW058A    | HAJIGANJ             | 23,3 | 90,9 | 1981 | 1999 | 18 | 2%(5)   |
| 70                                                | SW058B    | HAJIGANJ             | 23,3 | 90,9 | 2000 | 2009 | 10 | 1%(1)   |
| 71                                                | SW079     | MATLAB BAZAR         | 23,4 | 90,7 | 1983 | 2012 | 29 | 1%(3)   |
| 72                                                | SW095     | SURESWAR             | 23,3 | 90,4 | 1983 | 2012 | 29 | 3%(5)   |
| 73                                                | SW182     | COMPANYGANJ          | 22,9 | 91,4 | 1983 | 1999 | 17 | 8%(12)  |
| 74                                                | SW190     | MOSTAFAPUR           | 23,2 | 90,1 | 1983 | 2012 | 29 | 5%(8)   |
| 75                                                | SW222     | NOAKHALI             | 22,8 | 91,1 | 1981 | 2001 | 21 | 12%(12) |
| 76                                                | SW239.5   | PIARPUR              | 22,9 | 90,8 | 1997 | 2012 | 15 | 8%(5)   |
| 77                                                | SW239     | LAKSHMIPUR           | 22,9 | 90,8 | 1998 | 2007 | 9  | 7%(3)   |
| 78                                                | SW240A    | BHAWANGANJ           | 22,9 | 90,8 | 1981 | 1997 | 17 | 0%(0)   |
| 78                                                | SW240B    | BHAWANGANJ           | 22,9 | 90,8 | 2004 | 2012 | 9  | 7%(4)   |
| 79                                                | SW277.3A  | NILKAMAL             | 23,1 | 90,6 | 1981 | 1995 | 14 | 0%(0)   |
| 79                                                | SW277.3B  | NILKAMAL             | 23,1 | 90,6 | 1996 | 2012 | 16 | 7%(5)   |
| 80                                                | SW277A    | CHANDPUR             | 23,2 | 90,6 | 1981 | 2005 | 25 | 6%(12)  |
| 80                                                | SW277B    | CHANDPUR             | 23,2 | 90,6 | 2007 | 2014 | 7  | 5%(4)   |
| 81                                                | SW278A    | DAULATKHAN           | 22,6 | 90,8 | 1968 | 1980 | 12 | 0%(0)   |
| 81                                                | SW278B    | DAULATKHAN           | 22,6 | 90,8 | 1983 | 2003 | 20 | 3%(6)   |
| 82                                                | SW279     | TAJUMUDDIN           | 22,5 | 90,9 | 1968 | 1980 | 12 | 0%(0)   |
| 83                                                | SW288.4A  | BHOLA KHEYA GHAT     | 22,7 | 90,6 | 1990 | 2002 | 13 | 3%(4)   |
| 83                                                | SW288.4B  | BHOLA KHEYA GHAT     | 22,7 | 90,6 | 2004 | 2012 | 9  | 8%(4)   |
| 84                                                | SW320     | HIZLA                | 23,1 | 90,4 | 1990 | 2012 | 22 | 2%(4)   |
| 85                                                | SW321A    | HATIYA               | 22,4 | 91,1 | 1983 | 1993 | 11 | 0%(0)   |
| 85                                                | SW321B    | HATIYA               | 22,4 | 91,1 | 2007 | 2014 | 7  | 0%(0)   |
| 86                                                | SW323     | ABUPUR               | 23,2 | 90,3 | 1992 | 2012 | 20 | 2%(4)   |
| <b>REGION 6 – CHITTAGONG COASTAL PLAIN</b>        |           |                      |      |      |      |      |    |         |
| 87                                                | P0416     | SADARGHAT            | 22,3 | 91,8 | 1977 | 1991 | 14 | 0%(0)   |
| 88                                                | P1476     | COXS BAZAAR          | 21,4 | 92,0 | 1978 | 2006 | 29 | 12%(34) |
| 89                                                | P2196     | CHITTAGONG A         | 22,3 | 91,8 | 2007 | 2012 | 6  | 5%(3)   |
| 90                                                | SW086     | DHUMGHAT             | 22,9 | 91,5 | 1985 | 2002 | 17 | 8%(12)  |
| 91                                                | SW087     | SONAPUR              | 22,9 | 91,5 | 1987 | 1994 | 8  | 0%(0)   |
| 92                                                | SW120A    | TELPARI              | 22,5 | 91,9 | 1981 | 1985 | 5  | 0%(0)   |
| 93                                                | SW121     | ENAYETHAT            | 22,4 | 91,9 | 1981 | 1992 | 12 | 0%(0)   |
| 94                                                | SW125     | OUTFALL KARNAFULI    | 22,5 | 92,1 | 1981 | 1998 | 17 | 0%(1)   |
| 95                                                | SW153     | CHITTAGONG           | 22,3 | 91,8 | 1968 | 1979 | 11 | 15%(10) |
| 96                                                | SW176     | LEMSIKHALI           | 21,8 | 91,9 | 2004 | 2006 | 3  | 0%(0)   |
| 97                                                | SW204     | CHIRINGA             | 21,8 | 92,1 | 1981 | 2008 | 27 | 7%(12)  |
| 98                                                | SW213     | HARIPUR              | 23,0 | 91,5 | 1983 | 1995 | 12 | 3%(2)   |
| 99                                                | SW248     | DOHAZARI             | 22,2 | 92,1 | 1981 | 2006 | 26 | 4%(7)   |
| 100                                               | SW250     | BANIGRAM             | 22,1 | 91,9 | 1990 | 1999 | 10 | 0%(0)   |
| 101                                               | SW257A    | MALIPUR C&B RD       | 23,0 | 91,4 | 1986 | 2001 | 16 | 1%(1)   |
| 101                                               | SW257B    | MALIPUR C&B RD       | 23,0 | 91,4 | 2003 | 2008 | 6  | 17%(8)  |

**Table S2.** Regional RWL time series cross-correlation. The correlation coefficients are estimated between the detrended regional RWL common modes. All the coefficients are significantly different from zero ( $p < 0.001$ ).

|                                        | R1-HOOGHLY RIVER | R2-GANGES TIDAL FLOODPLAIN/SUNDBARBANS | R3-GANGES TIDAL FLOODPLAIN | R4-JAMUNA/BRAHMAPUTRA FLOODPLAIN | R5-GANGES/MEGHNA FLOODPLAIN | R6-CHITTAGONG COASTAL PLAIN |
|----------------------------------------|------------------|----------------------------------------|----------------------------|----------------------------------|-----------------------------|-----------------------------|
| R1-HOOGHLY RIVER                       |                  | 0.7                                    | 0.5                        | 0.5                              | 0.4                         | 0.3                         |
| R2-GANGES TIDAL FLOODPLAIN/SUNDBARBANS | 0.7              |                                        | 0.5                        | 0.4                              | 0.4                         | 0.3                         |
| R3-GANGES TIDAL FLOODPLAIN             | 0.6              | 0.5                                    |                            | 0.6                              | 0.4                         | 0.2                         |
| R4-JAMUNA/BRAHMAPUTRA FLOODPLAIN       | 0.5              | 0.4                                    | 0.6                        |                                  | 0.8                         | 0.4                         |
| R5-GANGES/MEGHNA FLOODPLAIN            | 0.4              | 0.4                                    | 0.4                        | 0.8                              |                             | 0.4                         |
| R6-CHITTAGONG COASTAL PLAIN            | 0.3              | 0.3                                    | 0.2                        | 0.4                              | 0.4                         |                             |

**Table S3a.** Contributions of sea-level rise for 2050 with respect to 1986/2005 in the Bay of Bengal (unit: m), based on the Integrated Climate Data Center (ICDC) at the University of Hamburg (<http://icdc.cen.uni-hamburg.de/1.html>) (notation: median [likely range]).

|              | RCP 4.5           | RCP 8.5           |
|--------------|-------------------|-------------------|
| Total (ICDC) | 0.22 [0.14; 0.30] | 0.24 [0.17; 0.32] |

**Table S3b.** Contributions of sea-level rise for 2100 with respect to 1986/2005 in the Bay of Bengal (unit: m), based on the ICDC (<http://icdc.cen.uni-hamburg.de/1.html>) and Golledge et al. (3) for Antarctica (notation: median [likely range]). The upper projections of Golledge et al. (3), which include MISI, is 4 cm higher than the IPCC Antarctica contribution (16 cm). Because some components are uncorrelated, the sum of the upper bounds of the likely ranges of all components is larger than the upper bound of the likely range of the total (4). Note that the regional ICDC and global IPCC projections are not exactly the same due to different methods used on global and regional scales (4).

|                                      | RCP 4.5            | RCP 8.5              |
|--------------------------------------|--------------------|----------------------|
| Sterodynamic component               | 0.23 [0.16; 0.30]  | 0.35 [0.27; 0.43]    |
| Mountain Glaciers                    | 0.13 [0.07; 0.19]  | 0.17 [0.10; 0.25]    |
| Greenland                            | 0.10 [0.06; 0.18]  | 0.17 [0.10 to 0.31]  |
| Antarctica (IPCC)                    | 0.06 [-0.06; 0.17] | 0.05 [-0.07 to 0.16] |
| Groundwater                          | 0.01 [0; 0.02]     | 0.01 [0; 0.02]       |
| Global Isostatic Adjustment          | 0 [-0.02; 0.02]    | 0 [-0.02; 0.02]      |
| Total (ICDC)                         | 0.53 [0.34; 0.74]  | 0.74 [0.50; 1.03]    |
| Antarctica from Golledge et al. (3)* | 0.06               | 0.20                 |

\* Golledge et al. (3) project the Antarctic contribution to sea-level rise to reach 0.18m in 2100 globally, which implies 0.2m in the Bay of Bengal due to the changes in Earth Gravity, Earth Rotation and solid Earth Deformation (5–7).

## References

1. BWDB, Bangladesh Water Development Board. Available at <https://www.bwdb.gov.bd/> (2019).
2. J.A. Brammer, A. H. Kassam, H. T. van Velthuisen, “Land resource appraisal of Bangladesh for agricultural development. Report 2: Agroecological regions of Bangladesh” (1988).
3. N. R. Golledge, *et al.*, The multi-millennial Antarctic commitment to future sea-level rise. *Nature* **526**, 421 (2015).
4. IPCC AR5, Climate Change 2013: The Physical Science Basis. *Working Group I Contribution to the Fifth Assessment Report of the Intergovernmental Panel on Climate Change. Summary for Policymakers (IPCC, 2013)* (2013).
5. J. X. Mitrovica, *et al.*, On the robustness of predictions of sea level fingerprints. *Geophysical Journal International* **187**, 729–742 (2011).
6. A. B. A. Slangen, *et al.*, Projecting twenty-first century regional sea-level changes. *Climatic change* **124**, 317–332 (2014).
7. J. M. Gregory, *et al.*, Concepts and terminology for sea level: mean, variability and change, both local and global. *Surveys in Geophysics*, 1–39 (2019).
